# Supplementary material for: Transcriptome analysis identifies genes involved in the somatic embryogenesis of Eucalyptus
Source: Research Square preprint supplement (doi:10.21203/rs.3.rs-47390/v3), 2020-11-11
Supplement: Supplementary file 2 [file 946ffde2eea65f8830ca00c8.xlsx]

## Sheet: A.specific.variants.gene.KEGG
Additional file 7. KEGG pathway enriched by the mutated genes specifically identified in E. camaldulensis.
Group	Pathway	ID	Gene_number	Total_number	Enrichment_factor	P-value	Q-value	Genes
Aging	Longevity regulating pathway	ko04211	67	166	3.23703	2.2e-16	8.118e-14	Eucgr.A00690.1,Eucgr.A00691.1,Eucgr.A00691.2,Eucgr.A00691.3,Eucgr.A00779.1,Eucgr.A00779.2,Eucgr.A00779.3,Eucgr.A00978.1,Eucgr.A02106.1,Eucgr.A02106.2,Eucgr.A02951.1,Eucgr.A02951.2,Eucgr.A02951.3,Eucgr.A02951.4,Eucgr.B00544.1,Eucgr.B00544.2,Eucgr.B00544.3,Eucgr.B02491.1,Eucgr.C00193.1,Eucgr.C00193.2,Eucgr.C00193.3,Eucgr.C00357.1,Eucgr.C01333.1,Eucgr.C01333.2,Eucgr.C01944.1,Eucgr.C02590.1,Eucgr.C04…
Folding, sorting and degradation	RNA degradation	ko03018	134	463	2.32115	2.2e-16	8.118e-14	Eucgr.A00103.1,Eucgr.A00103.2,Eucgr.A00692.1,Eucgr.A00692.2,Eucgr.A00717.1,Eucgr.A00717.2,Eucgr.A00969.1,Eucgr.A01414.1,Eucgr.A01414.2,Eucgr.A01414.3,Eucgr.A01535.1,Eucgr.A01535.2,Eucgr.A02028.1,Eucgr.A02028.2,Eucgr.A02036.1,Eucgr.A02036.2,Eucgr.A02036.3,Eucgr.A02045.1,Eucgr.A02045.2,Eucgr.A02070.1,Eucgr.A02074.1,Eucgr.A02083.1,Eucgr.A02083.2,Eucgr.A02131.1,Eucgr.A02131.2,Eucgr.A02131.3,Eucgr.A02…
Global and overview maps	Biosynthesis of antibiotics	ko01130	407	1598	2.04267	2.2e-16	8.118e-14	Eucgr.A00534.1,Eucgr.A00546.1,Eucgr.A00547.1,Eucgr.A00549.1,Eucgr.A00549.2,Eucgr.A00642.1,Eucgr.A00642.2,Eucgr.A00868.1,Eucgr.A00868.2,Eucgr.A00868.3,Eucgr.A01135.1,Eucgr.A01135.2,Eucgr.A01323.1,Eucgr.A01425.1,Eucgr.A01426.1,Eucgr.A01471.1,Eucgr.A01535.1,Eucgr.A01535.2,Eucgr.A01538.1,Eucgr.A01538.2,Eucgr.A01783.1,Eucgr.A01783.2,Eucgr.A01853.1,Eucgr.A01853.2,Eucgr.A01955.1,Eucgr.A01955.2,Eucgr.A01…
Global and overview maps	Biosynthesis of amino acids	ko01230	230	917	2.01158	2.2e-16	8.118e-14	Eucgr.A00052.1,Eucgr.A00868.1,Eucgr.A00868.2,Eucgr.A00868.3,Eucgr.A01021.1,Eucgr.A01021.2,Eucgr.A01021.3,Eucgr.A01021.4,Eucgr.A01021.5,Eucgr.A01021.6,Eucgr.A01135.1,Eucgr.A01135.2,Eucgr.A01323.1,Eucgr.A01471.1,Eucgr.A01535.1,Eucgr.A01535.2,Eucgr.A01538.1,Eucgr.A01538.2,Eucgr.A01853.1,Eucgr.A01853.2,Eucgr.A01955.1,Eucgr.A01955.2,Eucgr.A01976.1,Eucgr.A01976.2,Eucgr.A02126.1,Eucgr.A02126.2,Eucgr.A02…
Global and overview maps	Metabolic pathways	ko01100	1351	7441	1.45614	2.2e-16	8.118e-14	Eucgr.A00020.1,Eucgr.A00021.1,Eucgr.A00023.1,Eucgr.A00052.1,Eucgr.A00198.1,Eucgr.A00202.1,Eucgr.A00351.1,Eucgr.A00382.1,Eucgr.A00393.1,Eucgr.A00394.1,Eucgr.A00394.2,Eucgr.A00394.3,Eucgr.A00394.4,Eucgr.A00395.1,Eucgr.A00395.2,Eucgr.A00518.1,Eucgr.A00523.1,Eucgr.A00529.1,Eucgr.A00529.2,Eucgr.A00534.1,Eucgr.A00546.1,Eucgr.A00547.1,Eucgr.A00549.1,Eucgr.A00549.2,Eucgr.A00637.1,Eucgr.A00642.1,Eucgr.A00…
Global and overview maps	Microbial metabolism in diverse environments	ko01120	396	1794	1.77032	2.2e-16	8.118e-14	Eucgr.A00394.1,Eucgr.A00394.2,Eucgr.A00394.3,Eucgr.A00394.4,Eucgr.A00395.1,Eucgr.A00395.2,Eucgr.A00868.1,Eucgr.A00868.2,Eucgr.A00868.3,Eucgr.A01135.1,Eucgr.A01135.2,Eucgr.A01421.1,Eucgr.A01425.1,Eucgr.A01426.1,Eucgr.A01428.1,Eucgr.A01428.2,Eucgr.A01471.1,Eucgr.A01535.1,Eucgr.A01535.2,Eucgr.A01538.1,Eucgr.A01538.2,Eucgr.A01647.1,Eucgr.A01915.1,Eucgr.A01915.2,Eucgr.A01955.1,Eucgr.A01955.2,Eucgr.A01…
Global and overview maps	Carbon metabolism	ko01200	232	921	2.02026	2.2e-16	8.118e-14	Eucgr.A00394.1,Eucgr.A00394.2,Eucgr.A00394.3,Eucgr.A00394.4,Eucgr.A00395.1,Eucgr.A00395.2,Eucgr.A00868.1,Eucgr.A00868.2,Eucgr.A00868.3,Eucgr.A01135.1,Eucgr.A01135.2,Eucgr.A01425.1,Eucgr.A01426.1,Eucgr.A01535.1,Eucgr.A01535.2,Eucgr.A01538.1,Eucgr.A01538.2,Eucgr.A01915.1,Eucgr.A01915.2,Eucgr.A01955.1,Eucgr.A01955.2,Eucgr.A01976.1,Eucgr.A01976.2,Eucgr.A02028.1,Eucgr.A02028.2,Eucgr.A02070.1,Eucgr.A02…
Signal transduction	mTOR signaling pathway	ko04150	80	242	2.65127	2.2e-16	8.118e-14	Eucgr.A00690.1,Eucgr.A00691.1,Eucgr.A00691.2,Eucgr.A00691.3,Eucgr.A00779.1,Eucgr.A00779.2,Eucgr.A00779.3,Eucgr.A01954.1,Eucgr.A01974.1,Eucgr.A02106.1,Eucgr.A02106.2,Eucgr.A02398.1,Eucgr.A02398.2,Eucgr.A02398.3,Eucgr.A02398.4,Eucgr.B00544.1,Eucgr.B00544.2,Eucgr.B00544.3,Eucgr.B00871.1,Eucgr.B00871.2,Eucgr.B01116.1,Eucgr.B01157.1,Eucgr.C00193.1,Eucgr.C00193.2,Eucgr.C00193.3,Eucgr.C00357.1,Eucgr.C00…
Signal transduction	FoxO signaling pathway	ko04068	93	249	2.99546	2.2e-16	8.118e-14	Eucgr.A00690.1,Eucgr.A00691.1,Eucgr.A00691.2,Eucgr.A00691.3,Eucgr.A01974.1,Eucgr.A02951.1,Eucgr.A02951.2,Eucgr.A02951.3,Eucgr.A02951.4,Eucgr.B00544.1,Eucgr.B00544.2,Eucgr.B00544.3,Eucgr.B00871.1,Eucgr.B00871.2,Eucgr.B01157.1,Eucgr.B03800.1,Eucgr.B03800.2,Eucgr.C00193.1,Eucgr.C00193.2,Eucgr.C00193.3,Eucgr.C00357.1,Eucgr.C00849.1,Eucgr.C00849.2,Eucgr.C00849.3,Eucgr.C00849.4,Eucgr.C00849.5,Eucgr.C01…
Transcription	Spliceosome	ko03040	207	921	1.80256	2.2e-16	8.118e-14	Eucgr.A00103.1,Eucgr.A00103.2,Eucgr.A01323.1,Eucgr.A01412.1,Eucgr.A01414.1,Eucgr.A01414.2,Eucgr.A01414.3,Eucgr.A01415.1,Eucgr.A01427.1,Eucgr.A01467.1,Eucgr.A01529.1,Eucgr.A01529.2,Eucgr.A01529.3,Eucgr.A01529.4,Eucgr.A02031.1,Eucgr.L00005.1,Eucgr.B00227.1,Eucgr.B00227.2,Eucgr.B00227.3,Eucgr.B00227.4,Eucgr.B00394.1,Eucgr.B00593.1,Eucgr.B00614.1,Eucgr.B00614.2,Eucgr.B01229.1,Eucgr.B01229.2,Eucgr.B01…
Translation	RNA transport	ko03013	251	905	2.22436	2.2e-16	8.118e-14	Eucgr.A00103.1,Eucgr.A00103.2,Eucgr.A00600.1,Eucgr.A00904.1,Eucgr.A00904.2,Eucgr.A00969.1,Eucgr.A01323.1,Eucgr.A01414.1,Eucgr.A01414.2,Eucgr.A01414.3,Eucgr.A01431.1,Eucgr.A01431.2,Eucgr.A01431.3,Eucgr.A01461.1,Eucgr.A01461.2,Eucgr.A01739.1,Eucgr.A01739.2,Eucgr.A02028.1,Eucgr.A02028.2,Eucgr.A02031.1,Eucgr.A02070.1,Eucgr.A02074.1,Eucgr.A02106.1,Eucgr.A02106.2,Eucgr.A02199.1,Eucgr.A02306.1,Eucgr.A02…
Translation	Ribosome biogenesis in eukaryotes	ko03008	102	319	2.56442	2.2e-16	8.118e-14	Eucgr.A00036.1,Eucgr.A00197.1,Eucgr.A01301.1,Eucgr.A01461.1,Eucgr.A01461.2,Eucgr.A02611.1,Eucgr.A02611.2,Eucgr.A02921.1,Eucgr.A02966.1,Eucgr.B00661.1,Eucgr.B02075.1,Eucgr.B03813.1,Eucgr.C01368.1,Eucgr.C01368.2,Eucgr.C01368.3,Eucgr.C01368.4,Eucgr.C01368.5,Eucgr.C01415.1,Eucgr.C01415.2,Eucgr.C01415.3,Eucgr.C01415.4,Eucgr.C02168.1,Eucgr.C02168.2,Eucgr.C02353.1,Eucgr.C02353.2,Eucgr.C04195.1,Eucgr.D01…
Translation	mRNA surveillance pathway	ko03015	157	605	2.08125	2.2e-16	8.118e-14	Eucgr.A00103.1,Eucgr.A00103.2,Eucgr.A00969.1,Eucgr.A01171.1,Eucgr.A01171.2,Eucgr.A01414.1,Eucgr.A01414.2,Eucgr.A01414.3,Eucgr.A01454.1,Eucgr.A01454.2,Eucgr.A01542.1,Eucgr.A02028.1,Eucgr.A02028.2,Eucgr.A02070.1,Eucgr.A02074.1,Eucgr.B02760.1,Eucgr.L00007.1,Eucgr.L00007.2,Eucgr.B00529.1,Eucgr.B00852.1,Eucgr.B00852.2,Eucgr.B00852.3,Eucgr.B00852.4,Eucgr.B02140.1,Eucgr.B02150.1,Eucgr.B02150.2,Eucgr.B02…
Carbohydrate metabolism	Glycolysis / Gluconeogenesis	ko00010	145	589	1.97439	3.1e-16	1.1439e-13	Eucgr.A00546.1,Eucgr.A00547.1,Eucgr.A00549.1,Eucgr.A00549.2,Eucgr.A00868.1,Eucgr.A00868.2,Eucgr.A00868.3,Eucgr.A01535.1,Eucgr.A01535.2,Eucgr.A01538.1,Eucgr.A01538.2,Eucgr.A02028.1,Eucgr.A02028.2,Eucgr.A02070.1,Eucgr.A02074.1,Eucgr.B02760.1,Eucgr.B00144.1,Eucgr.B00144.2,Eucgr.B00144.3,Eucgr.B00144.4,Eucgr.B00529.1,Eucgr.B02864.1,Eucgr.B02864.2,Eucgr.B02942.1,Eucgr.B02942.2,Eucgr.B03208.1,Eucgr.B03…
Environmental adaptation	Circadian rhythm	ko04710	61	163	3.00139	3.773e-16	1.39224e-13	Eucgr.A00690.1,Eucgr.A00691.1,Eucgr.A00691.2,Eucgr.A00691.3,Eucgr.B00544.1,Eucgr.B00544.2,Eucgr.B00544.3,Eucgr.B01285.1,Eucgr.B01285.2,Eucgr.B01285.3,Eucgr.B01286.1,Eucgr.B01286.2,Eucgr.B01286.3,Eucgr.B01286.4,Eucgr.B02585.1,Eucgr.B02585.2,Eucgr.B03401.1,Eucgr.C00193.1,Eucgr.C00193.2,Eucgr.C00193.3,Eucgr.C00357.1,Eucgr.C01282.1,Eucgr.C01333.1,Eucgr.C01333.2,Eucgr.C01944.1,Eucgr.C02590.1,Eucgr.C03…
Folding, sorting and degradation	Protein processing in endoplasmic reticulum	ko04141	244	1186	1.65	8.091e-16	2.98558e-13	Eucgr.A00001.1,Eucgr.A00078.1,Eucgr.A00078.2,Eucgr.A00190.1,Eucgr.A00285.1,Eucgr.A00285.2,Eucgr.A00356.1,Eucgr.A00356.2,Eucgr.A01044.1,Eucgr.A01044.2,Eucgr.A01106.1,Eucgr.A01106.2,Eucgr.A01117.1,Eucgr.A01169.1,Eucgr.A01287.1,Eucgr.A01812.1,Eucgr.A02461.1,Eucgr.A02734.1,Eucgr.A02734.2,Eucgr.B00341.1,Eucgr.B00997.1,Eucgr.B01116.1,Eucgr.B01285.1,Eucgr.B01285.2,Eucgr.B01285.3,Eucgr.B01286.1,Eucgr.B01…
Signal transduction	Plant hormone signal transduction	ko04075	225	1084	1.66469	4.164e-15	1.53652e-12	Eucgr.A00133.1,Eucgr.A00189.1,Eucgr.A00189.3,Eucgr.A00189.2,Eucgr.A00213.1,Eucgr.A00213.2,Eucgr.A00213.3,Eucgr.A00514.1,Eucgr.A00514.2,Eucgr.A00514.3,Eucgr.A00998.1,Eucgr.A01019.1,Eucgr.A01323.1,Eucgr.A01495.1,Eucgr.A01919.1,Eucgr.A01919.2,Eucgr.A01919.3,Eucgr.A01926.1,Eucgr.A02031.1,Eucgr.A02033.1,Eucgr.A02033.2,Eucgr.A02033.3,Eucgr.A02240.1,Eucgr.A02754.1,Eucgr.A02850.1,Eucgr.B00556.1,Eucgr.B01…
Folding, sorting and degradation	Ubiquitin mediated proteolysis	ko04120	117	469	2.00075	8.549e-14	3.15458e-11	Eucgr.A00356.1,Eucgr.A00356.2,Eucgr.A01178.1,Eucgr.A01178.2,Eucgr.A01178.3,Eucgr.A01573.1,Eucgr.A02580.1,Eucgr.A02582.1,Eucgr.A02838.1,Eucgr.A02838.2,Eucgr.A02838.3,Eucgr.A02838.4,Eucgr.A02838.5,Eucgr.B01270.1,Eucgr.B01270.2,Eucgr.B01270.3,Eucgr.B01270.4,Eucgr.B01285.1,Eucgr.B01285.2,Eucgr.B01285.3,Eucgr.B01286.1,Eucgr.B01286.2,Eucgr.B01286.3,Eucgr.B01286.4,Eucgr.B02080.1,Eucgr.B02080.2,Eucgr.B02…
Signal transduction	PI3K-Akt signaling pathway	ko04151	108	422	2.05254	1.302e-13	4.80438e-11	Eucgr.A00690.1,Eucgr.A00691.1,Eucgr.A00691.2,Eucgr.A00691.3,Eucgr.A00779.1,Eucgr.A00779.2,Eucgr.A00779.3,Eucgr.A01044.1,Eucgr.A01044.2,Eucgr.A01913.1,Eucgr.A01913.2,Eucgr.A01913.3,Eucgr.A01913.4,Eucgr.A01974.1,Eucgr.A02106.1,Eucgr.A02106.2,Eucgr.A02398.1,Eucgr.A02398.2,Eucgr.A02398.3,Eucgr.A02398.4,Eucgr.A02734.1,Eucgr.A02734.2,Eucgr.B00544.1,Eucgr.B00544.2,Eucgr.B00544.3,Eucgr.B00871.1,Eucgr.B00…
Glycan biosynthesis and metabolism	N-Glycan biosynthesis	ko00510	53	148	2.87206	2.514e-13	9.27666e-11	Eucgr.B02538.1,Eucgr.C00651.1,Eucgr.C00651.2,Eucgr.C01008.1,Eucgr.C01369.1,Eucgr.D00298.1,Eucgr.D00298.2,Eucgr.D00298.3,Eucgr.E02385.1,Eucgr.E04113.1,Eucgr.E04252.1,Eucgr.F01245.1,Eucgr.F01802.1,Eucgr.F01802.2,Eucgr.F04021.1,Eucgr.F04021.2,Eucgr.F04021.3,Eucgr.G01893.1,Eucgr.G02629.1,Eucgr.G02629.2,Eucgr.G02629.3,Eucgr.G02629.4,Eucgr.G02629.5,Eucgr.H04989.1,Eucgr.H04989.2,Eucgr.H04989.3,Eucgr.H04…
Amino acid metabolism	Cysteine and methionine metabolism	ko00270	93	345	2.16194	2.534e-13	9.35046e-11	Eucgr.A01021.1,Eucgr.A01021.2,Eucgr.A01021.3,Eucgr.A01021.4,Eucgr.A01021.5,Eucgr.A01021.6,Eucgr.A01487.1,Eucgr.A01487.2,Eucgr.A01853.1,Eucgr.A01853.2,Eucgr.A02126.1,Eucgr.A02126.2,Eucgr.A02126.3,Eucgr.A02126.4,Eucgr.L00009.1,Eucgr.L00009.2,Eucgr.L00009.3,Eucgr.B01011.1,Eucgr.B01011.2,Eucgr.B01017.1,Eucgr.B01017.2,Eucgr.B01017.3,Eucgr.B01892.1,Eucgr.B01892.2,Eucgr.B02001.1,Eucgr.B02001.2,Eucgr.B03…
Transport and catabolism	Peroxisome	ko04146	87	315	2.21508	3.41e-13	1.25829e-10	Eucgr.A00382.1,Eucgr.A00529.1,Eucgr.A00529.2,Eucgr.A02951.1,Eucgr.A02951.2,Eucgr.A02951.3,Eucgr.A02951.4,Eucgr.B00317.1,Eucgr.B01579.1,Eucgr.B01579.2,Eucgr.B01579.3,Eucgr.B01579.4,Eucgr.C04041.1,Eucgr.C04181.1,Eucgr.D00288.1,Eucgr.D00644.1,Eucgr.D01734.1,Eucgr.D01734.2,Eucgr.D01734.3,Eucgr.D01734.4,Eucgr.D01734.5,Eucgr.E00577.1,Eucgr.E00577.2,Eucgr.E00577.3,Eucgr.E02750.1,Eucgr.E03957.1,Eucgr.E03…
Signal transduction	AMPK signaling pathway	ko04152	81	286	2.27143	5.174e-13	1.90921e-10	Eucgr.A00690.1,Eucgr.A00691.1,Eucgr.A00691.2,Eucgr.A00691.3,Eucgr.A00779.1,Eucgr.A00779.2,Eucgr.A00779.3,Eucgr.A01236.1,Eucgr.A01236.2,Eucgr.A01535.1,Eucgr.A01535.2,Eucgr.B00544.1,Eucgr.B00544.2,Eucgr.B00544.3,Eucgr.B02150.1,Eucgr.B02150.2,Eucgr.B02491.1,Eucgr.B03031.1,Eucgr.B03618.1,Eucgr.C00193.1,Eucgr.C00193.2,Eucgr.C00193.3,Eucgr.C00357.1,Eucgr.C00617.1,Eucgr.C00639.1,Eucgr.C00639.2,Eucgr.C00…
Translation	Ribosome	ko03010	166	777	1.71343	1.523e-12	5.61987e-10	Eucgr.A00378.1,Eucgr.A00378.2,Eucgr.A00913.1,Eucgr.A00913.2,Eucgr.A00913.3,Eucgr.A01152.1,Eucgr.A01225.1,Eucgr.A01408.1,Eucgr.A01424.1,Eucgr.A01711.1,Eucgr.A01929.1,Eucgr.A01929.2,Eucgr.A02018.1,Eucgr.A02018.2,Eucgr.A02200.1,Eucgr.A02228.1,Eucgr.A02371.1,Eucgr.A02519.1,Eucgr.A02519.2,Eucgr.A02903.1,Eucgr.A02903.2,Eucgr.A02903.3,Eucgr.A02919.1,Eucgr.A02919.2,Eucgr.H01868.1,Eucgr.H01868.2,Eucgr.L00…
Transport and catabolism	Autophagy - yeast	ko04138	98	384	2.0468	2.076e-12	7.66044e-10	Eucgr.A00711.1,Eucgr.A00978.1,Eucgr.A00994.1,Eucgr.A01454.1,Eucgr.A01454.2,Eucgr.A01592.1,Eucgr.A02398.1,Eucgr.A02398.2,Eucgr.A02398.3,Eucgr.A02398.4,Eucgr.A02601.1,Eucgr.B00538.1,Eucgr.B01536.1,Eucgr.B01536.2,Eucgr.B01921.1,Eucgr.B02027.1,Eucgr.B02492.1,Eucgr.B02492.2,Eucgr.B03422.1,Eucgr.B04021.1,Eucgr.C03719.1,Eucgr.C04028.1,Eucgr.D00310.1,Eucgr.D00310.2,Eucgr.D00310.3,Eucgr.D00310.4,Eucgr.D01…
Signal transduction	Sphingolipid signaling pathway	ko04071	78	283	2.21049	6.219e-12	2.29481e-09	Eucgr.A00994.1,Eucgr.A01974.1,Eucgr.B00871.1,Eucgr.B00871.2,Eucgr.B01157.1,Eucgr.B02150.1,Eucgr.B02150.2,Eucgr.B03031.1,Eucgr.B03618.1,Eucgr.C00639.1,Eucgr.C00639.2,Eucgr.C00639.3,Eucgr.C00849.1,Eucgr.C00849.2,Eucgr.C00849.3,Eucgr.C00849.4,Eucgr.C00849.5,Eucgr.C04140.1,Eucgr.C04140.2,Eucgr.D00310.1,Eucgr.D00310.2,Eucgr.D00310.3,Eucgr.D00310.4,Eucgr.E00652.1,Eucgr.E00652.2,Eucgr.E01170.1,Eucgr.E01…
Cellular community - eukaryotes	Tight junction	ko04530	90	347	2.08014	6.282e-12	2.31806e-09	Eucgr.A00690.1,Eucgr.A00691.1,Eucgr.A00691.2,Eucgr.A00691.3,Eucgr.A00904.1,Eucgr.A00904.2,Eucgr.A01236.1,Eucgr.A01236.2,Eucgr.A01561.1,Eucgr.A02108.1,Eucgr.A02756.1,Eucgr.B00544.1,Eucgr.B00544.2,Eucgr.B00544.3,Eucgr.B02029.1,Eucgr.B02272.1,Eucgr.B03031.1,Eucgr.B03604.1,Eucgr.B03604.2,Eucgr.B03604.3,Eucgr.B03929.1,Eucgr.C00193.1,Eucgr.C00193.2,Eucgr.C00193.3,Eucgr.C00357.1,Eucgr.C00639.1,Eucgr.C00…
Global and overview maps	Biosynthesis of secondary metabolites	ko01110	792	5138	1.23626	7.132e-12	2.63171e-09	Eucgr.A00052.1,Eucgr.A00198.1,Eucgr.A00202.1,Eucgr.A00351.1,Eucgr.A00518.1,Eucgr.A00529.1,Eucgr.A00529.2,Eucgr.A00534.1,Eucgr.A00546.1,Eucgr.A00547.1,Eucgr.A00549.1,Eucgr.A00549.2,Eucgr.A00637.1,Eucgr.A00642.1,Eucgr.A00642.2,Eucgr.A00868.1,Eucgr.A00868.2,Eucgr.A00868.3,Eucgr.A00966.1,Eucgr.A01021.1,Eucgr.A01021.2,Eucgr.A01021.3,Eucgr.A01021.4,Eucgr.A01021.5,Eucgr.A01021.6,Eucgr.A01135.1,Eucgr.A01…
Carbohydrate metabolism	Pyruvate metabolism	ko00620	92	362	2.03826	1.244e-11	4.59036e-09	Eucgr.A00052.1,Eucgr.A01915.1,Eucgr.A01915.2,Eucgr.A02028.1,Eucgr.A02028.2,Eucgr.A02070.1,Eucgr.A02074.1,Eucgr.B02769.1,Eucgr.B00529.1,Eucgr.B01425.1,Eucgr.B03208.1,Eucgr.B03349.1,Eucgr.B03349.2,Eucgr.C01003.1,Eucgr.C01003.2,Eucgr.C01003.3,Eucgr.C01003.4,Eucgr.C02177.1,Eucgr.C02177.2,Eucgr.D00489.1,Eucgr.D00489.2,Eucgr.D01335.1,Eucgr.D01335.2,Eucgr.D01335.3,Eucgr.D02166.1,Eucgr.D02251.1,Eucgr.D02…
Energy metabolism	Carbon fixation pathways in prokaryotes	ko00720	36	87	3.31866	1.317e-11	4.85973e-09	Eucgr.A00394.1,Eucgr.A00394.2,Eucgr.A00394.3,Eucgr.A00394.4,Eucgr.A00395.1,Eucgr.A00395.2,Eucgr.A01915.1,Eucgr.A01915.2,Eucgr.B02769.1,Eucgr.B01425.1,Eucgr.B02610.1,Eucgr.B02610.2,Eucgr.B02610.3,Eucgr.B03307.1,Eucgr.B03307.2,Eucgr.B03307.3,Eucgr.C02177.1,Eucgr.C02177.2,Eucgr.D00489.1,Eucgr.D00489.2,Eucgr.F01229.1,Eucgr.F02901.1,Eucgr.F02901.2,Eucgr.H00849.1,Eucgr.H01081.1,Eucgr.I00055.1,Eucgr.I00…
Cellular community - eukaryotes	Gap junction	ko04540	42	113	2.98092	1.815e-11	6.69735e-09	Eucgr.A01561.1,Eucgr.A01974.1,Eucgr.A02108.1,Eucgr.A02762.1,Eucgr.B00871.1,Eucgr.B00871.2,Eucgr.B01157.1,Eucgr.B01420.1,Eucgr.B03604.1,Eucgr.B03604.2,Eucgr.B03604.3,Eucgr.C00849.1,Eucgr.C00849.2,Eucgr.C00849.3,Eucgr.C00849.4,Eucgr.C00849.5,Eucgr.D01853.1,Eucgr.D01853.2,Eucgr.D01853.3,Eucgr.D01853.4,Eucgr.D01853.5,Eucgr.D01975.1,Eucgr.E00284.1,Eucgr.E00652.1,Eucgr.E00652.2,Eucgr.F01374.1,Eucgr.F01…
Signal transduction	Phospholipase D signaling pathway	ko04072	57	185	2.47106	3.747e-11	1.38264e-08	Eucgr.A01618.1,Eucgr.A01618.2,Eucgr.A01773.1,Eucgr.A01974.1,Eucgr.A02397.1,Eucgr.A02397.2,Eucgr.A02397.3,Eucgr.A02397.4,Eucgr.B00871.1,Eucgr.B00871.2,Eucgr.B01157.1,Eucgr.B02855.1,Eucgr.C00196.1,Eucgr.C00196.2,Eucgr.C00481.1,Eucgr.C00849.1,Eucgr.C00849.2,Eucgr.C00849.3,Eucgr.C00849.4,Eucgr.C00849.5,Eucgr.C02736.1,Eucgr.D00427.1,Eucgr.D01169.1,Eucgr.D01369.1,Eucgr.D01369.2,Eucgr.D01966.1,Eucgr.E00…
Signal transduction	HIF-1 signaling pathway	ko04066	62	212	2.3455	6.143e-11	2.26677e-08	Eucgr.A00779.1,Eucgr.A00779.2,Eucgr.A00779.3,Eucgr.A01573.1,Eucgr.A01974.1,Eucgr.A02028.1,Eucgr.A02028.2,Eucgr.A02070.1,Eucgr.A02074.1,Eucgr.A02106.1,Eucgr.A02106.2,Eucgr.B00144.1,Eucgr.B00144.2,Eucgr.B00144.3,Eucgr.B00144.4,Eucgr.B00529.1,Eucgr.B00871.1,Eucgr.B00871.2,Eucgr.B01157.1,Eucgr.B03208.1,Eucgr.B03711.1,Eucgr.C00559.1,Eucgr.C00849.1,Eucgr.C00849.2,Eucgr.C00849.3,Eucgr.C00849.4,Eucgr.C00…
Metabolism of cofactors and vitamins	Pantothenate and CoA biosynthesis	ko00770	42	117	2.87901	6.633e-11	2.44758e-08	Eucgr.L00052.1,Eucgr.L00052.2,Eucgr.L00052.3,Eucgr.B00108.1,Eucgr.B02001.1,Eucgr.B02001.2,Eucgr.B02940.1,Eucgr.B02940.2,Eucgr.B02940.3,Eucgr.B03235.1,Eucgr.B03313.1,Eucgr.B03313.2,Eucgr.C01441.1,Eucgr.C01728.1,Eucgr.C02768.1,Eucgr.C04109.1,Eucgr.E03535.1,Eucgr.D02433.1,Eucgr.F03215.1,Eucgr.F03215.2,Eucgr.F03215.3,Eucgr.F03216.1,Eucgr.H00962.1,Eucgr.G00868.1,Eucgr.G02361.1,Eucgr.G02361.2,Eucgr.G02…
Lipid metabolism	Fatty acid degradation	ko00071	55	180	2.45059	1.165e-10	4.29885e-08	Eucgr.A00529.1,Eucgr.A00529.2,Eucgr.B01578.1,Eucgr.B03349.1,Eucgr.B03349.2,Eucgr.C01261.1,Eucgr.C01265.1,Eucgr.D01734.1,Eucgr.D01734.2,Eucgr.D01734.3,Eucgr.D01734.4,Eucgr.D01734.5,Eucgr.F00121.1,Eucgr.F03800.1,Eucgr.F03800.2,Eucgr.F03800.3,Eucgr.F04402.1,Eucgr.G00490.1,Eucgr.G00490.2,Eucgr.H00849.1,Eucgr.H02279.1,Eucgr.H03948.1,Eucgr.H03948.2,Eucgr.H03948.3,Eucgr.H04950.1,Eucgr.I00009.1,Eucgr.I00…
Nervous system	Synaptic vesicle cycle	ko04721	46	139	2.65413	2.003e-10	7.39107e-08	Eucgr.A01954.1,Eucgr.A02245.1,Eucgr.A02574.1,Eucgr.B00569.1,Eucgr.B00569.2,Eucgr.B02492.1,Eucgr.B02492.2,Eucgr.B03422.1,Eucgr.C02831.1,Eucgr.C02831.2,Eucgr.D01169.1,Eucgr.D01713.2,Eucgr.D01713.3,Eucgr.D01986.1,Eucgr.D01986.2,Eucgr.E00053.1,Eucgr.E03294.1,Eucgr.F00645.1,Eucgr.F00645.2,Eucgr.F00645.3,Eucgr.F01613.1,Eucgr.F04030.1,Eucgr.G00082.1,Eucgr.G00082.2,Eucgr.G01736.1,Eucgr.G01788.1,Eucgr.G01…
Carbohydrate metabolism	Amino sugar and nucleotide sugar metabolism	ko00520	109	478	1.82885	2.118e-10	7.81542e-08	Eucgr.A00020.1,Eucgr.A00021.1,Eucgr.A01962.1,Eucgr.A01962.2,Eucgr.A02178.1,Eucgr.A02178.2,Eucgr.A02848.1,Eucgr.B02760.1,Eucgr.B01380.1,Eucgr.B01494.1,Eucgr.B02118.1,Eucgr.B02118.2,Eucgr.B02118.3,Eucgr.B02352.1,Eucgr.B02942.1,Eucgr.B02942.2,Eucgr.B03711.1,Eucgr.B03792.1,Eucgr.B03792.2,Eucgr.B03902.1,Eucgr.B03902.2,Eucgr.C00223.1,Eucgr.C00395.1,Eucgr.C00559.1,Eucgr.C00818.1,Eucgr.C00818.2,Eucgr.C00…
Global and overview maps	2-Oxocarboxylic acid metabolism	ko01210	71	267	2.13269	3.101e-10	1.14427e-07	Eucgr.A00052.1,Eucgr.A01135.1,Eucgr.A01135.2,Eucgr.A01955.1,Eucgr.A01955.2,Eucgr.L00052.1,Eucgr.L00052.2,Eucgr.L00052.3,Eucgr.B00108.1,Eucgr.B00409.1,Eucgr.B02001.1,Eucgr.B02001.2,Eucgr.B02940.1,Eucgr.B02940.2,Eucgr.B02940.3,Eucgr.B03437.1,Eucgr.C01441.1,Eucgr.C01728.1,Eucgr.C02768.1,Eucgr.C02894.1,Eucgr.C04109.1,Eucgr.E03535.1,Eucgr.D02433.1,Eucgr.L00147.1,Eucgr.L00147.2,Eucgr.F01566.1,Eucgr.F02…
Endocrine system	Adipocytokine signaling pathway	ko04920	41	118	2.78665	3.538e-10	1.30552e-07	Eucgr.A00690.1,Eucgr.A00691.1,Eucgr.A00691.2,Eucgr.A00691.3,Eucgr.B00544.1,Eucgr.B00544.2,Eucgr.B00544.3,Eucgr.B02491.1,Eucgr.C00193.1,Eucgr.C00193.2,Eucgr.C00193.3,Eucgr.C00357.1,Eucgr.C01333.1,Eucgr.C01333.2,Eucgr.C01944.1,Eucgr.C02590.1,Eucgr.C04226.1,Eucgr.D00272.1,Eucgr.D00481.1,Eucgr.D01734.1,Eucgr.D01734.2,Eucgr.D01734.3,Eucgr.D01734.4,Eucgr.D01734.5,Eucgr.L00156.1,Eucgr.E00017.1,Eucgr.G00…
Carbohydrate metabolism	Citrate cycle (TCA cycle)	ko00020	50	168	2.38693	2.169e-09	8.00361e-07	Eucgr.A01135.1,Eucgr.A01135.2,Eucgr.A01955.1,Eucgr.A01955.2,Eucgr.A02028.1,Eucgr.A02028.2,Eucgr.A02070.1,Eucgr.A02074.1,Eucgr.B00529.1,Eucgr.B03208.1,Eucgr.B03307.1,Eucgr.B03307.2,Eucgr.B03307.3,Eucgr.E01071.1,Eucgr.E01909.1,Eucgr.E01909.2,Eucgr.F01093.1,Eucgr.F02506.1,Eucgr.F02901.1,Eucgr.F02901.2,Eucgr.F03161.1,Eucgr.F03161.2,Eucgr.F03161.3,Eucgr.F03251.1,Eucgr.F04341.1,Eucgr.F04341.2,Eucgr.G01…
Signal transduction	TGF-beta signaling pathway	ko04350	50	168	2.38693	2.169e-09	8.00361e-07	Eucgr.A00779.1,Eucgr.A00779.2,Eucgr.A00779.3,Eucgr.A01974.1,Eucgr.B00871.1,Eucgr.B00871.2,Eucgr.B01157.1,Eucgr.B01285.1,Eucgr.B01285.2,Eucgr.B01285.3,Eucgr.B01286.1,Eucgr.B01286.2,Eucgr.B01286.3,Eucgr.B01286.4,Eucgr.B02585.1,Eucgr.B02585.2,Eucgr.B03031.1,Eucgr.B03401.1,Eucgr.E00652.1,Eucgr.E00652.2,Eucgr.E02785.1,Eucgr.E02785.2,Eucgr.E02785.4,Eucgr.F01374.1,Eucgr.F01598.1,Eucgr.F01672.1,Eucgr.F01…
Endocrine system	Insulin signaling pathway	ko04910	80	329	1.95018	2.43e-09	8.9667e-07	Eucgr.A00690.1,Eucgr.A00691.1,Eucgr.A00691.2,Eucgr.A00691.3,Eucgr.A00779.1,Eucgr.A00779.2,Eucgr.A00779.3,Eucgr.A01974.1,Eucgr.A02106.1,Eucgr.A02106.2,Eucgr.B00519.1,Eucgr.B00544.1,Eucgr.B00544.2,Eucgr.B00544.3,Eucgr.B00596.1,Eucgr.B00871.1,Eucgr.B00871.2,Eucgr.B01157.1,Eucgr.B02140.1,Eucgr.B02302.1,Eucgr.B02302.2,Eucgr.B02302.3,Eucgr.B02411.1,Eucgr.B03711.1,Eucgr.C00193.1,Eucgr.C00193.2,Eucgr.C00…
Carbohydrate metabolism	Inositol phosphate metabolism	ko00562	54	189	2.29146	2.567e-09	9.47223e-07	Eucgr.A01618.1,Eucgr.A01618.2,Eucgr.A02727.1,Eucgr.B01444.1,Eucgr.B01444.2,Eucgr.B02253.1,Eucgr.B02259.1,Eucgr.B02259.2,Eucgr.C00949.1,Eucgr.C03186.1,Eucgr.C03194.1,Eucgr.C03194.2,Eucgr.D00427.1,Eucgr.D02214.1,Eucgr.E00263.1,Eucgr.E00306.1,Eucgr.E00765.1,Eucgr.E00765.2,Eucgr.E00765.3,Eucgr.A00482.1,Eucgr.A00482.2,Eucgr.F02638.1,Eucgr.F02638.2,Eucgr.F02656.1,Eucgr.F02656.2,Eucgr.F02685.1,Eucgr.F02…
Endocrine system	Glucagon signaling pathway	ko04922	84	358	1.88181	5.951e-09	2.19592e-06	Eucgr.A00349.1,Eucgr.A00690.1,Eucgr.A00691.1,Eucgr.A00691.2,Eucgr.A00691.3,Eucgr.A01457.1,Eucgr.A01457.2,Eucgr.A02028.1,Eucgr.A02028.2,Eucgr.A02070.1,Eucgr.A02074.1,Eucgr.B00519.1,Eucgr.B00529.1,Eucgr.B00544.1,Eucgr.B00544.2,Eucgr.B00544.3,Eucgr.B03208.1,Eucgr.C00193.1,Eucgr.C00193.2,Eucgr.C00193.3,Eucgr.C00357.1,Eucgr.C00642.1,Eucgr.C00642.2,Eucgr.C01117.1,Eucgr.C01117.2,Eucgr.C01333.1,Eucgr.C01…
Endocrine and metabolic diseases	Insulin resistance	ko04931	60	230	2.0922	1.525e-08	5.62725e-06	Eucgr.A00690.1,Eucgr.A00691.1,Eucgr.A00691.2,Eucgr.A00691.3,Eucgr.A00779.1,Eucgr.A00779.2,Eucgr.A00779.3,Eucgr.A02045.1,Eucgr.B00370.1,Eucgr.B00544.1,Eucgr.B00544.2,Eucgr.B00544.3,Eucgr.B02140.1,Eucgr.B02302.1,Eucgr.B02302.2,Eucgr.B02302.3,Eucgr.C00193.1,Eucgr.C00193.2,Eucgr.C00193.3,Eucgr.C00357.1,Eucgr.C01333.1,Eucgr.C01333.2,Eucgr.C01944.1,Eucgr.C02590.1,Eucgr.C03066.1,Eucgr.C03066.2,Eucgr.C03…
Folding, sorting and degradation	Proteasome	ko03050	42	138	2.4409	1.974e-08	7.28406e-06	Eucgr.B02730.1,Eucgr.B04032.1,Eucgr.B04032.2,Eucgr.B04032.3,Eucgr.C01514.1,Eucgr.C01514.2,Eucgr.C02133.1,Eucgr.C02133.2,Eucgr.C04160.1,Eucgr.D02637.1,Eucgr.E00889.1,Eucgr.E01309.1,Eucgr.E01309.2,Eucgr.E01416.1,Eucgr.E01416.2,Eucgr.F02001.1,Eucgr.F02001.2,Eucgr.F03722.1,Eucgr.F04120.1,Eucgr.F04120.2,Eucgr.F04339.1,Eucgr.F04339.2,Eucgr.H00058.1,Eucgr.H02608.1,Eucgr.H03435.1,Eucgr.L00637.1,Eucgr.I00…
Transport and catabolism	Phagosome	ko04145	73	305	1.91957	2.397e-08	8.84493e-06	Eucgr.A00190.1,Eucgr.A00285.1,Eucgr.A00285.2,Eucgr.A01561.1,Eucgr.A01954.1,Eucgr.A02108.1,Eucgr.B01429.1,Eucgr.B01429.2,Eucgr.B03570.1,Eucgr.B03570.2,Eucgr.B03571.1,Eucgr.B03604.1,Eucgr.B03604.2,Eucgr.B03604.3,Eucgr.C02831.1,Eucgr.C02831.2,Eucgr.C03186.1,Eucgr.C03194.1,Eucgr.C03194.2,Eucgr.D00427.1,Eucgr.D01853.1,Eucgr.D01853.2,Eucgr.D01853.3,Eucgr.D01853.4,Eucgr.D01853.5,Eucgr.D01975.1,Eucgr.E00…
Endocrine system	Oxytocin signaling pathway	ko04921	62	247	2.01314	4.188e-08	1.54537e-05	Eucgr.A00690.1,Eucgr.A00691.1,Eucgr.A00691.2,Eucgr.A00691.3,Eucgr.A01457.1,Eucgr.A01457.2,Eucgr.A01974.1,Eucgr.B00519.1,Eucgr.B00544.1,Eucgr.B00544.2,Eucgr.B00544.3,Eucgr.B00871.1,Eucgr.B00871.2,Eucgr.B01157.1,Eucgr.B02140.1,Eucgr.B02302.1,Eucgr.B02302.2,Eucgr.B02302.3,Eucgr.B02491.1,Eucgr.C00193.1,Eucgr.C00193.2,Eucgr.C00193.3,Eucgr.C00357.1,Eucgr.C00642.1,Eucgr.C00642.2,Eucgr.C00849.1,Eucgr.C00…
Amino acid metabolism	Valine, leucine and isoleucine biosynthesis	ko00290	36	117	2.46772	1.453e-07	5.36157e-05	Eucgr.A00052.1,Eucgr.L00052.1,Eucgr.L00052.2,Eucgr.L00052.3,Eucgr.B00108.1,Eucgr.B02001.1,Eucgr.B02001.2,Eucgr.B02940.1,Eucgr.B02940.2,Eucgr.B02940.3,Eucgr.C01441.1,Eucgr.C01728.1,Eucgr.C02768.1,Eucgr.C04109.1,Eucgr.E03535.1,Eucgr.D02433.1,Eucgr.F03215.1,Eucgr.F03215.2,Eucgr.F03215.3,Eucgr.F03216.1,Eucgr.H00962.1,Eucgr.G02361.1,Eucgr.G02361.2,Eucgr.G02361.3,Eucgr.G02361.4,Eucgr.H02913.1,Eucgr.H02…
Glycan biosynthesis and metabolism	Glycosaminoglycan biosynthesis - heparan sulfate / heparin	ko00534	21	51	3.30239	2.604e-07	9.60876e-05	Eucgr.C04217.1,Eucgr.F01131.1,Eucgr.F03260.1,Eucgr.F03260.2,Eucgr.F03260.3,Eucgr.F03260.4,Eucgr.F03260.5,Eucgr.F03473.1,Eucgr.F03473.2,Eucgr.F03738.1,Eucgr.F03738.2,Eucgr.F03738.3,Eucgr.F03738.4,Eucgr.F03738.5,Eucgr.G02723.1,Eucgr.G02723.2,Eucgr.G03038.1,Eucgr.H00106.1,Eucgr.J00384.1,Eucgr.K00083.1,Eucgr.K02191.1,
Energy metabolism	Methane metabolism	ko00680	68	299	1.82397	5.434e-07	0.000200515	Eucgr.A00868.1,Eucgr.A00868.2,Eucgr.A00868.3,Eucgr.A01535.1,Eucgr.A01535.2,Eucgr.A01538.1,Eucgr.A01538.2,Eucgr.A01915.1,Eucgr.A01915.2,Eucgr.B02864.1,Eucgr.B02864.2,Eucgr.C00617.1,Eucgr.C00956.1,Eucgr.C00956.2,Eucgr.C00956.3,Eucgr.C02986.1,Eucgr.C02986.2,Eucgr.D00489.1,Eucgr.D00489.2,Eucgr.D00596.1,Eucgr.D00596.2,Eucgr.D00956.1,Eucgr.E00422.1,Eucgr.E00422.2,Eucgr.F00121.1,Eucgr.F01229.1,Eucgr.F01…
Signal transduction	MAPK signaling pathway - yeast	ko04011	53	214	1.98629	6.071e-07	0.00022402	Eucgr.A01618.1,Eucgr.A01618.2,Eucgr.A01913.1,Eucgr.A01913.2,Eucgr.A01913.3,Eucgr.A01913.4,Eucgr.A01974.1,Eucgr.B00871.1,Eucgr.B00871.2,Eucgr.B00983.1,Eucgr.B01157.1,Eucgr.B02237.1,Eucgr.C03421.1,Eucgr.D00427.1,Eucgr.D01414.1,Eucgr.D01416.1,Eucgr.E00652.1,Eucgr.E00652.2,Eucgr.F00330.1,Eucgr.F00330.2,Eucgr.F00330.3,Eucgr.F00370.1,Eucgr.F00370.2,Eucgr.F01374.1,Eucgr.F01598.1,Eucgr.F01775.1,Eucgr.F01…
Glycan biosynthesis and metabolism	Various types of N-glycan biosynthesis	ko00513	36	125	2.30979	8.758e-07	0.00032317	Eucgr.C00651.1,Eucgr.C00651.2,Eucgr.C01008.1,Eucgr.D00298.1,Eucgr.D00298.2,Eucgr.D00298.3,Eucgr.E02385.1,Eucgr.E04113.1,Eucgr.F01245.1,Eucgr.F01802.1,Eucgr.F01802.2,Eucgr.F04021.1,Eucgr.F04021.2,Eucgr.F04021.3,Eucgr.G01893.1,Eucgr.G02629.1,Eucgr.G02629.2,Eucgr.G02629.3,Eucgr.G02629.4,Eucgr.G02629.5,Eucgr.H04989.1,Eucgr.H04989.2,Eucgr.H04989.3,Eucgr.H04989.4,Eucgr.I01147.1,Eucgr.I01147.2,Eucgr.I01…
Metabolism of other amino acids	Glutathione metabolism	ko00480	64	282	1.82016	1.242e-06	0.000458298	Eucgr.A01180.1,Eucgr.A01200.1,Eucgr.A01487.1,Eucgr.A01487.2,Eucgr.B02780.1,Eucgr.B02456.1,Eucgr.B02456.2,Eucgr.B02456.3,Eucgr.B02456.4,Eucgr.B02456.5,Eucgr.B03441.1,Eucgr.B03816.1,Eucgr.C00345.1,Eucgr.D00024.1,Eucgr.D00025.1,Eucgr.D01833.1,Eucgr.D01848.1,Eucgr.D01848.2,Eucgr.D01848.3,Eucgr.D01857.1,Eucgr.D01857.2,Eucgr.D01861.1,Eucgr.D01861.2,Eucgr.E00579.1,Eucgr.E00579.2,Eucgr.F01424.1,Eucgr.F01…
Amino acid metabolism	Lysine biosynthesis	ko00300	23	64	2.88222	1.272e-06	0.000469368	Eucgr.B03437.1,Eucgr.L00147.1,Eucgr.L00147.2,Eucgr.F01566.1,Eucgr.F02037.1,Eucgr.F02952.1,Eucgr.F02952.2,Eucgr.F04402.1,Eucgr.G01124.1,Eucgr.G01640.1,Eucgr.G01640.2,Eucgr.G01640.3,Eucgr.G01640.4,Eucgr.I01605.1,Eucgr.I01605.2,Eucgr.I01605.3,Eucgr.I02445.1,Eucgr.I02445.2,Eucgr.I02445.3,Eucgr.I02445.4,Eucgr.I02445.5,Eucgr.K03171.1,Eucgr.K03171.2,
Amino acid metabolism	Valine, leucine and isoleucine degradation	ko00280	48	192	2.00503	1.509e-06	0.000556821	Eucgr.A00382.1,Eucgr.B00991.1,Eucgr.B01578.1,Eucgr.B02001.1,Eucgr.B02001.2,Eucgr.B02479.1,Eucgr.B02479.2,Eucgr.B02479.3,Eucgr.B02479.4,Eucgr.B02479.5,Eucgr.B02479.6,Eucgr.B02479.7,Eucgr.B03349.1,Eucgr.B03349.2,Eucgr.C01076.1,Eucgr.C01076.2,Eucgr.C01076.3,Eucgr.C01728.1,Eucgr.D01931.1,Eucgr.E00577.1,Eucgr.E00577.2,Eucgr.E00577.3,Eucgr.F03800.1,Eucgr.F03800.2,Eucgr.F03800.3,Eucgr.F04402.1,Eucgr.G02…
Endocrine system	PPAR signaling pathway	ko03320	29	93	2.50089	1.685e-06	0.000621765	Eucgr.A00529.1,Eucgr.A00529.2,Eucgr.B01578.1,Eucgr.D01734.1,Eucgr.D01734.2,Eucgr.D01734.3,Eucgr.D01734.4,Eucgr.D01734.5,Eucgr.D02378.1,Eucgr.E02861.1,Eucgr.E02861.2,Eucgr.E02861.3,Eucgr.E03706.1,Eucgr.E04091.1,Eucgr.G00490.1,Eucgr.G00490.2,Eucgr.J01029.1,Eucgr.J03080.1,Eucgr.J03080.2,Eucgr.K01080.1,Eucgr.K01080.2,Eucgr.K01396.1,Eucgr.K01396.2,Eucgr.K01396.3,Eucgr.K03601.1,Eucgr.K03601.2,Eucgr.K03…
Nervous system	Serotonergic synapse	ko04726	17	40	3.40854	2.109e-06	0.000778221	Eucgr.A01974.1,Eucgr.B00871.1,Eucgr.B00871.2,Eucgr.B01157.1,Eucgr.C00849.1,Eucgr.C00849.2,Eucgr.C00849.3,Eucgr.C00849.4,Eucgr.C00849.5,Eucgr.E00652.1,Eucgr.E00652.2,Eucgr.F01374.1,Eucgr.F01598.1,Eucgr.H00554.1,Eucgr.J00966.1,Eucgr.K02871.1,Eucgr.K02871.2,
Signal transduction	Apelin signaling pathway	ko04371	55	234	1.88507	2.184e-06	0.000805896	Eucgr.A00690.1,Eucgr.A00691.1,Eucgr.A00691.2,Eucgr.A00691.3,Eucgr.A00779.1,Eucgr.A00779.2,Eucgr.A00779.3,Eucgr.A01974.1,Eucgr.B00519.1,Eucgr.B00544.1,Eucgr.B00544.2,Eucgr.B00544.3,Eucgr.B00871.1,Eucgr.B00871.2,Eucgr.B01157.1,Eucgr.C00193.1,Eucgr.C00193.2,Eucgr.C00193.3,Eucgr.C00357.1,Eucgr.C00849.1,Eucgr.C00849.2,Eucgr.C00849.3,Eucgr.C00849.4,Eucgr.C00849.5,Eucgr.C01333.1,Eucgr.C01333.2,Eucgr.C01…
Endocrine system	Thyroid hormone synthesis	ko04918	24	71	2.71102	2.659e-06	0.000981171	Eucgr.A01044.1,Eucgr.A01044.2,Eucgr.B03110.1,Eucgr.B03570.1,Eucgr.B03570.2,Eucgr.B03571.1,Eucgr.B03816.1,Eucgr.C00797.1,Eucgr.C00797.2,Eucgr.C03260.1,Eucgr.C03325.1,Eucgr.D00684.1,Eucgr.D00684.2,Eucgr.D01857.1,Eucgr.D01857.2,Eucgr.E00579.1,Eucgr.E00579.2,Eucgr.F03612.2,Eucgr.H00972.1,Eucgr.H02279.1,Eucgr.I01474.1,Eucgr.J02805.1,Eucgr.K03307.1,Eucgr.K03307.2,
Glycan biosynthesis and metabolism	Glycosaminoglycan biosynthesis - chondroitin sulfate / dermatan sulfate	ko00532	15	33	3.6455	3.018e-06	0.00111364	Eucgr.C04217.1,Eucgr.F01131.1,Eucgr.F03260.1,Eucgr.F03260.2,Eucgr.F03260.3,Eucgr.F03260.4,Eucgr.F03260.5,Eucgr.F03473.1,Eucgr.F03473.2,Eucgr.F03738.1,Eucgr.F03738.2,Eucgr.F03738.3,Eucgr.F03738.4,Eucgr.F03738.5,Eucgr.H00106.1,
Carbohydrate metabolism	Glyoxylate and dicarboxylate metabolism	ko00630	68	313	1.74239	3.022e-06	0.00111512	Eucgr.A01955.1,Eucgr.A01955.2,Eucgr.A02028.1,Eucgr.A02028.2,Eucgr.A02070.1,Eucgr.A02249.1,Eucgr.A02249.2,Eucgr.B00991.1,Eucgr.B03208.1,Eucgr.C00150.1,Eucgr.C02180.1,Eucgr.C02180.2,Eucgr.C03047.1,Eucgr.C03047.2,Eucgr.D00288.1,Eucgr.D01946.1,Eucgr.D01946.2,Eucgr.E01095.1,Eucgr.E01095.2,Eucgr.E03976.1,Eucgr.F01093.1,Eucgr.F01775.1,Eucgr.F01775.2,Eucgr.F01777.1,Eucgr.F02167.1,Eucgr.F02167.2,Eucgr.F02…
Cell motility	Regulation of actin cytoskeleton	ko04810	60	267	1.80227	3.665e-06	0.00135239	Eucgr.A01618.1,Eucgr.A01618.2,Eucgr.A01974.1,Eucgr.A02344.1,Eucgr.A02756.1,Eucgr.B00871.1,Eucgr.B00871.2,Eucgr.B01157.1,Eucgr.B02140.1,Eucgr.B02272.1,Eucgr.B02302.1,Eucgr.B02302.2,Eucgr.B02302.3,Eucgr.B03929.1,Eucgr.C00137.1,Eucgr.C00137.2,Eucgr.C00849.1,Eucgr.C00849.2,Eucgr.C00849.3,Eucgr.C00849.4,Eucgr.C00849.5,Eucgr.C00962.1,Eucgr.C03186.1,Eucgr.C03194.1,Eucgr.C03194.2,Eucgr.C03788.1,Eucgr.C03…
Global and overview maps	Fatty acid metabolism	ko01212	58	256	1.81705	4.034e-06	0.00148855	Eucgr.A00529.1,Eucgr.A00529.2,Eucgr.A02228.1,Eucgr.A02449.1,Eucgr.B02769.1,Eucgr.L00008.1,Eucgr.B01425.1,Eucgr.B01578.1,Eucgr.B03234.1,Eucgr.C01082.1,Eucgr.C01082.2,Eucgr.C01082.3,Eucgr.C01082.4,Eucgr.C01082.5,Eucgr.C01261.1,Eucgr.C01265.1,Eucgr.C02177.1,Eucgr.C02177.2,Eucgr.C04139.1,Eucgr.C04139.2,Eucgr.D01734.1,Eucgr.D01734.2,Eucgr.D01734.3,Eucgr.D01734.4,Eucgr.D01734.5,Eucgr.E00394.1,Eucgr.E00…
Signal transduction	TNF signaling pathway	ko04668	19	51	2.98788	5.699e-06	0.00210293	Eucgr.A01974.1,Eucgr.B00871.1,Eucgr.B00871.2,Eucgr.B01157.1,Eucgr.C00849.1,Eucgr.C00849.2,Eucgr.C00849.3,Eucgr.C00849.4,Eucgr.C00849.5,Eucgr.E00652.1,Eucgr.E00652.2,Eucgr.F01374.1,Eucgr.F01598.1,Eucgr.F03612.2,Eucgr.H00554.1,Eucgr.I02611.1,Eucgr.I02611.2,Eucgr.I02611.3,Eucgr.J00966.1,
Digestive system	Vitamin digestion and absorption	ko04977	13	27	3.86153	6.286e-06	0.00231953	Eucgr.B02811.1,Eucgr.B02811.2,Eucgr.B02811.3,Eucgr.B02811.4,Eucgr.E01720.1,Eucgr.F02073.1,Eucgr.F02074.1,Eucgr.F02074.2,Eucgr.F02074.3,Eucgr.F02083.1,Eucgr.K01420.1,Eucgr.K01420.2,Eucgr.K03470.1,
Endocrine system	Thyroid hormone signaling pathway	ko04919	48	205	1.87788	1.042e-05	0.00384498	Eucgr.A01974.1,Eucgr.B00871.1,Eucgr.B00871.2,Eucgr.B01157.1,Eucgr.B02119.1,Eucgr.B02259.1,Eucgr.B02259.2,Eucgr.B03381.1,Eucgr.C00849.1,Eucgr.C00849.2,Eucgr.C00849.3,Eucgr.C00849.4,Eucgr.C00849.5,Eucgr.C03571.1,Eucgr.C04186.1,Eucgr.C04186.2,Eucgr.E00652.1,Eucgr.E00652.2,Eucgr.E02785.1,Eucgr.E02785.2,Eucgr.E02785.4,Eucgr.F01374.1,Eucgr.F01598.1,Eucgr.F04062.1,Eucgr.F04065.1,Eucgr.H00962.1,Eucgr.H00…
Amino acid metabolism	Glycine, serine and threonine metabolism	ko00260	69	331	1.67186	1.13e-05	0.0041697	Eucgr.A00868.1,Eucgr.A00868.2,Eucgr.A00868.3,Eucgr.A02028.1,Eucgr.A02028.2,Eucgr.A02070.1,Eucgr.B02605.1,Eucgr.B03208.1,Eucgr.B03298.1,Eucgr.B03437.1,Eucgr.C00846.1,Eucgr.C03047.1,Eucgr.C03047.2,Eucgr.D01946.1,Eucgr.D01946.2,Eucgr.D01996.1,Eucgr.L00147.1,Eucgr.L00147.2,Eucgr.E01095.1,Eucgr.E01095.2,Eucgr.F01093.1,Eucgr.F01234.1,Eucgr.F01237.1,Eucgr.F01566.1,Eucgr.F02037.1,Eucgr.F02167.1,Eucgr.F02…
Nervous system	Long-term depression	ko04730	28	97	2.31508	1.313e-05	0.00484497	Eucgr.A01974.1,Eucgr.B00871.1,Eucgr.B00871.2,Eucgr.B01157.1,Eucgr.B01420.1,Eucgr.B03031.1,Eucgr.C00849.1,Eucgr.C00849.2,Eucgr.C00849.3,Eucgr.C00849.4,Eucgr.C00849.5,Eucgr.E00652.1,Eucgr.E00652.2,Eucgr.F01374.1,Eucgr.F01598.1,Eucgr.F01977.1,Eucgr.H00454.1,Eucgr.H00554.1,Eucgr.H00875.1,Eucgr.H03267.1,Eucgr.H03267.2,Eucgr.H03968.1,Eucgr.I02787.1,Eucgr.J00966.1,Eucgr.K00946.1,Eucgr.K01869.1,Eucgr.K01…
Metabolism of cofactors and vitamins	Riboflavin metabolism	ko00740	23	73	2.52688	1.601e-05	0.00590769	Eucgr.D01798.1,Eucgr.D01849.1,Eucgr.D02237.1,Eucgr.E00805.1,Eucgr.E00805.2,Eucgr.E00805.3,Eucgr.E00805.4,Eucgr.E00805.5,Eucgr.G00874.1,Eucgr.G00874.2,Eucgr.G00874.3,Eucgr.G02074.1,Eucgr.G02074.2,Eucgr.G02074.3,Eucgr.G02074.4,Eucgr.H00559.1,Eucgr.E02956.1,Eucgr.E02956.2,Eucgr.E02956.3,Eucgr.K02925.1,Eucgr.K02925.2,Eucgr.K02925.3,Eucgr.K02925.4,
Folding, sorting and degradation	SNARE interactions in vesicular transport	ko04130	27	93	2.32842	1.657e-05	0.00611433	Eucgr.A02574.1,Eucgr.B00538.1,Eucgr.C02862.1,Eucgr.C02862.2,Eucgr.E00245.1,Eucgr.E00245.2,Eucgr.E00245.3,Eucgr.E00248.1,Eucgr.E00637.1,Eucgr.F00400.1,Eucgr.F02475.1,Eucgr.F02475.2,Eucgr.F02922.1,Eucgr.F03509.1,Eucgr.F03509.2,Eucgr.F03509.3,Eucgr.F03509.4,Eucgr.F04087.1,Eucgr.G01919.1,Eucgr.K00388.1,Eucgr.K01922.1,Eucgr.K01922.2,Eucgr.K02608.1,Eucgr.K02611.1,Eucgr.K02612.1,Eucgr.K02613.1,Eucgr.K02…
Energy metabolism	Oxidative phosphorylation	ko00190	60	280	1.71859	1.727e-05	0.00637263	Eucgr.A01954.1,Eucgr.B00400.1,Eucgr.B00400.2,Eucgr.B00400.3,Eucgr.B01464.1,Eucgr.B03562.1,Eucgr.C00140.1,Eucgr.C00220.1,Eucgr.C01383.1,Eucgr.C01792.1,Eucgr.C01792.2,Eucgr.C02092.1,Eucgr.C02092.2,Eucgr.C02831.1,Eucgr.C02831.2,Eucgr.C04383.1,Eucgr.E01702.1,Eucgr.B00038.1,Eucgr.F00645.1,Eucgr.F00645.2,Eucgr.F00645.3,Eucgr.F01613.1,Eucgr.F03885.1,Eucgr.F04030.1,Eucgr.G01736.1,Eucgr.G01788.1,Eucgr.G01…
Folding, sorting and degradation	Protein export	ko03060	29	104	2.23637	1.921e-05	0.00708849	Eucgr.A00001.1,Eucgr.A00017.1,Eucgr.A00017.2,Eucgr.A00190.1,Eucgr.A02032.1,Eucgr.B03237.1,Eucgr.B03455.1,Eucgr.B03455.2,Eucgr.B03484.1,Eucgr.C00797.1,Eucgr.C00797.2,Eucgr.C02497.1,Eucgr.C02536.1,Eucgr.C03260.1,Eucgr.C03325.1,Eucgr.E00860.1,Eucgr.F00038.1,Eucgr.F03808.1,Eucgr.F03808.2,Eucgr.F03808.3,Eucgr.F03832.1,Eucgr.G02037.1,Eucgr.G02037.2,Eucgr.H02279.1,Eucgr.H04475.1,Eucgr.H04475.2,Eucgr.J01…
Carbohydrate metabolism	Pentose phosphate pathway	ko00030	67	326	1.6483	2.413e-05	0.00890397	Eucgr.A01425.1,Eucgr.A01426.1,Eucgr.A01535.1,Eucgr.A01535.2,Eucgr.A01538.1,Eucgr.A01538.2,Eucgr.A01976.1,Eucgr.A01976.2,Eucgr.B02760.1,Eucgr.B02864.1,Eucgr.B02864.2,Eucgr.B02917.1,Eucgr.B02942.1,Eucgr.B02942.2,Eucgr.C00617.1,Eucgr.C00818.1,Eucgr.C00818.2,Eucgr.C00956.1,Eucgr.C00956.2,Eucgr.C00956.3,Eucgr.C01947.1,Eucgr.C01947.2,Eucgr.C02986.1,Eucgr.C02986.2,Eucgr.D00956.1,Eucgr.D02030.1,Eucgr.E00…
Cellular community - eukaryotes	Signaling pathways regulating pluripotency of stem cells	ko04550	34	132	2.06578	2.457e-05	0.00906633	Eucgr.A01974.1,Eucgr.A02588.1,Eucgr.A02588.2,Eucgr.B00871.1,Eucgr.B00871.2,Eucgr.B01157.1,Eucgr.B02625.1,Eucgr.B02625.2,Eucgr.C00434.1,Eucgr.C00434.2,Eucgr.C00434.3,Eucgr.C00434.4,Eucgr.C00849.1,Eucgr.C00849.2,Eucgr.C00849.3,Eucgr.C00849.4,Eucgr.C00849.5,Eucgr.C02727.1,Eucgr.C02727.2,Eucgr.C02727.3,Eucgr.C02727.4,Eucgr.C03571.1,Eucgr.D01935.1,Eucgr.D01935.2,Eucgr.E00652.1,Eucgr.E00652.2,Eucgr.F00…
Development	Dorso-ventral axis formation	ko04320	22	70	2.5206	2.538e-05	0.00936522	Eucgr.A01974.1,Eucgr.B00871.1,Eucgr.B00871.2,Eucgr.B01157.1,Eucgr.C00849.1,Eucgr.C00849.2,Eucgr.C00849.3,Eucgr.C00849.4,Eucgr.C00849.5,Eucgr.E00099.1,Eucgr.E00099.2,Eucgr.E00099.3,Eucgr.E00652.1,Eucgr.E00652.2,Eucgr.E03358.1,Eucgr.E03358.2,Eucgr.F01000.1,Eucgr.F01374.1,Eucgr.F01598.1,Eucgr.H00554.1,Eucgr.H00689.1,Eucgr.J00966.1,
Endocrine and metabolic diseases	Type II diabetes mellitus	ko04930	19	57	2.67337	3.565e-05	0.0131548	Eucgr.A01974.1,Eucgr.B00871.1,Eucgr.B00871.2,Eucgr.B01157.1,Eucgr.B03711.1,Eucgr.C00559.1,Eucgr.C00983.1,Eucgr.D02166.1,Eucgr.E00652.1,Eucgr.E00652.2,Eucgr.F01374.1,Eucgr.F01598.1,Eucgr.G02720.1,Eucgr.G02720.2,Eucgr.I02503.1,Eucgr.J00966.1,Eucgr.J01749.1,Eucgr.K02074.1,Eucgr.K02074.2,
Nucleotide metabolism	Purine metabolism	ko00230	87	457	1.5268	3.565e-05	0.0131548	Eucgr.A00023.1,Eucgr.A00534.1,Eucgr.A00642.1,Eucgr.A00642.2,Eucgr.A01976.1,Eucgr.A01976.2,Eucgr.A02068.1,Eucgr.A02380.1,Eucgr.A02380.2,Eucgr.A02380.3,Eucgr.A02380.4,Eucgr.A02394.1,Eucgr.A02930.1,Eucgr.B02760.1,Eucgr.B00164.1,Eucgr.B00213.1,Eucgr.B01158.1,Eucgr.B01158.2,Eucgr.B01158.3,Eucgr.B02942.1,Eucgr.B02942.2,Eucgr.B03157.1,Eucgr.B03469.1,Eucgr.B03469.2,Eucgr.B03499.1,Eucgr.B03499.2,Eucgr.B03…
Excretory system	Endocrine and other factor-regulated calcium reabsorption	ko04961	17	49	2.78248	5.099e-05	0.0188153	Eucgr.B02298.1,Eucgr.D00474.1,Eucgr.D01169.1,Eucgr.E00053.1,Eucgr.F01183.1,Eucgr.F03288.1,Eucgr.F03288.2,Eucgr.G00082.1,Eucgr.G00082.2,Eucgr.G03075.1,Eucgr.I00531.1,Eucgr.I02791.1,Eucgr.J00193.1,Eucgr.J00193.2,Eucgr.J00193.3,Eucgr.J01771.1,Eucgr.J01771.2,
Amino acid metabolism	Tyrosine metabolism	ko00350	49	225	1.7466	6.336e-05	0.0233798	Eucgr.A01853.1,Eucgr.A01853.2,Eucgr.A02022.1,Eucgr.B02605.1,Eucgr.B03298.1,Eucgr.C02894.1,Eucgr.D00657.1,Eucgr.D01135.1,Eucgr.D01688.1,Eucgr.D01996.1,Eucgr.D02334.1,Eucgr.F00121.1,Eucgr.F01171.1,Eucgr.F01171.2,Eucgr.F01184.1,Eucgr.F01185.1,Eucgr.F01234.1,Eucgr.F01237.1,Eucgr.F03770.1,Eucgr.H02279.1,Eucgr.H04950.1,Eucgr.I00009.1,Eucgr.I00009.2,Eucgr.I00009.3,Eucgr.I00224.1,Eucgr.I00224.2,Eucgr.I00…
Lipid metabolism	alpha-Linolenic acid metabolism	ko00592	47	214	1.76142	7.111e-05	0.0262396	Eucgr.A00529.1,Eucgr.A00529.2,Eucgr.A01923.1,Eucgr.B00139.1,Eucgr.B01448.1,Eucgr.C00820.1,Eucgr.C00820.2,Eucgr.C01261.1,Eucgr.C01265.1,Eucgr.C03551.1,Eucgr.D00427.1,Eucgr.F01505.1,Eucgr.F02479.1,Eucgr.F02923.1,Eucgr.F02925.1,Eucgr.F02955.1,Eucgr.F03543.1,Eucgr.G00499.1,Eucgr.G00501.1,Eucgr.G00507.1,Eucgr.H03948.1,Eucgr.H03948.2,Eucgr.H03948.3,Eucgr.H04950.1,Eucgr.I00009.1,Eucgr.I00009.2,Eucgr.I00…
Lipid metabolism	Glycerophospholipid metabolism	ko00564	69	350	1.58111	7.283e-05	0.0268743	Eucgr.A00914.1,Eucgr.A01773.1,Eucgr.A01923.1,Eucgr.A02397.1,Eucgr.A02397.2,Eucgr.A02397.3,Eucgr.A02397.4,Eucgr.B02760.1,Eucgr.B00213.1,Eucgr.B00946.1,Eucgr.B02259.1,Eucgr.B02259.2,Eucgr.B02855.1,Eucgr.B02865.1,Eucgr.B02865.2,Eucgr.C00196.1,Eucgr.C00196.2,Eucgr.C00818.1,Eucgr.C00818.2,Eucgr.C01140.1,Eucgr.C01140.2,Eucgr.C01140.3,Eucgr.C01140.4,Eucgr.C02186.1,Eucgr.C02186.2,Eucgr.D01966.1,Eucgr.E00…
Signal transduction	MAPK signaling pathway - fly	ko04013	42	185	1.82078	7.65e-05	0.0282285	Eucgr.A01974.1,Eucgr.A02951.1,Eucgr.A02951.2,Eucgr.A02951.3,Eucgr.A02951.4,Eucgr.A02966.1,Eucgr.B00871.1,Eucgr.B00871.2,Eucgr.B01157.1,Eucgr.C00849.1,Eucgr.C00849.2,Eucgr.C00849.3,Eucgr.C00849.4,Eucgr.C00849.5,Eucgr.C00962.1,Eucgr.E00652.1,Eucgr.E00652.2,Eucgr.E04235.1,Eucgr.F01374.1,Eucgr.F01598.1,Eucgr.F03612.2,Eucgr.G03132.1,Eucgr.H00554.1,Eucgr.I00742.1,Eucgr.I00742.2,Eucgr.I02393.1,Eucgr.J00…
Energy metabolism	Carbon fixation in photosynthetic organisms	ko00710	62	308	1.61444	8.887e-05	0.032793	Eucgr.A01538.1,Eucgr.A01538.2,Eucgr.A01915.1,Eucgr.A01915.2,Eucgr.B00144.1,Eucgr.B00144.2,Eucgr.B00144.3,Eucgr.B00144.4,Eucgr.B02864.1,Eucgr.B02864.2,Eucgr.B02917.1,Eucgr.C00150.1,Eucgr.C01003.1,Eucgr.C01003.2,Eucgr.C01003.3,Eucgr.C01003.4,Eucgr.C02894.1,Eucgr.D00489.1,Eucgr.D00489.2,Eucgr.D02251.1,Eucgr.D02251.2,Eucgr.D02251.3,Eucgr.D02251.4,Eucgr.D02251.5,Eucgr.E00422.1,Eucgr.E00422.2,Eucgr.E01…
Carbohydrate metabolism	Butanoate metabolism	ko00650	20	67	2.39406	0.0001302	0.0480438	Eucgr.L00052.1,Eucgr.L00052.2,Eucgr.L00052.3,Eucgr.B00108.1,Eucgr.B00991.1,Eucgr.B02632.1,Eucgr.D01931.1,Eucgr.D02433.1,Eucgr.F02900.1,Eucgr.F03215.1,Eucgr.F03215.2,Eucgr.F03215.3,Eucgr.F03216.1,Eucgr.H00962.1,Eucgr.H00595.1,Eucgr.H00849.1,Eucgr.K01341.1,Eucgr.K02346.1,Eucgr.K02720.1,Eucgr.L01056.1,
